# Supplementary material for: Orientation toward humans predicts cognitive performance in orang-utans
Source: PubMed Central journal article supplement (PMC5220318; doi:10.1038/srep40052), 2017-01-09
Supplement: srep40052-s1.pdf [file srep40052-s1.pdf]

## Supplementary material

### Orientation toward humans predicts cognitive performance in orang-utans

<sup>1</sup>Laura A. Damerius\* & <sup>1</sup>Sofia I. F. Forss\* (\* = shared first authorship), <sup>1</sup>Zaida K. Kosonen, <sup>1</sup>Erik P. Willems, <sup>1</sup>Judith M. Burkart, <sup>2</sup>Josep Call, <sup>3</sup>Birute M. Galdikas, <sup>4</sup>Katja Liebal, <sup>5</sup>Daniel B. Haun and <sup>1</sup>Carel P. van Schaik

<sup>1</sup>*Anthropological Institute and Museum, University of Zurich, Switzerland*

<sup>2</sup>*School of Psychology and Neuroscience, University of St. Andrews, United Kingdom*

<sup>3</sup>*Department of Archaeology, Simon Fraser University, Burnaby, BC, Canada*

<sup>4</sup>*Department of Education and Psychology, Freie University Berlin, Germany*

<sup>5</sup>*Leipzig Research Center for Early Child Development, University of Leipzig, Germany*

**Supplementary Table S1:** Parameter estimates from a binomial GLMM, predicting the probability of an animal solving the task when excluding independent variables for the novelty response tests.

| Generalized Linear Mixed Model of overall performance in the honey tool-task.                                                                |          |           |          |                     |
|----------------------------------------------------------------------------------------------------------------------------------------------|----------|-----------|----------|---------------------|
| Parameter estimates from a binomial GLMM, predicting the probability of an animal solving the task.                                          |          |           |          |                     |
|                                                                                                                                              | <i>B</i> | <i>SE</i> | <i>Z</i> | <i>p value</i>      |
| <b>Human Orientation Index</b>                                                                                                               | 0.243    | 0.09      | 2.679    | <b>0.007 **</b>     |
| Age                                                                                                                                          | -0.018   | 0.03      | -0.582   | 0.561               |
| SEX (male)                                                                                                                                   | -0.619   | 0.53      | -1.158   | 0.247               |
| Species (Sumatra)                                                                                                                            | 0.295    | 0.60      | 0.484    | 0.628               |
| <u>Background</u>                                                                                                                            |          |           |          |                     |
| Wild vs. Rest                                                                                                                                | -0.212   | 0.24      | -0.890   | 0.373               |
| Rehab vs. Zoo                                                                                                                                | -0.131   | 0.30      | -0.436   | 0.663               |
| Unknown vs. Rehab.Rest                                                                                                                       | 0.160    | 0.22      | 0.730    | 0.466               |
| Human vs. Station (within rehabilitation station)                                                                                            | -0.489   | 0.52      | -0.933   | 0.351               |
| Mother vs. Hand (within zoo)                                                                                                                 | 0.383    | 0.52      | 0.573    | 0.465               |
| <u>Accessibility (trend analysis)</u>                                                                                                        |          |           |          |                     |
| Linear                                                                                                                                       | 1.211    | 0.87      | 1.395    | 0.163               |
| Quadratic                                                                                                                                    | 1.209    | 0.97      | 1.249    | 0.212               |
| Cubic                                                                                                                                        | 0.099    | 0.97      | 0.103    | 0.918               |
| <u>Sub-task (trend analysis)</u>                                                                                                             |          |           |          |                     |
| <b>Linear</b>                                                                                                                                | -5.046   | 0.72      | -6.981   | <b>&lt;0.001***</b> |
| <b>Quadratic</b>                                                                                                                             | 1.512    | 0.42      | 3.567    | <b>&lt;0.001***</b> |
| Cubic                                                                                                                                        | -0.149   | 0.33      | -0.457   | 0.648               |
| Note: Analysis included 94 individuals in 10 different zoos/rehab stations, totalling 376 observations, $\chi^2_{ML} = 220.60$ , $P < 0.001$ |          |           |          |                     |

**Supplementary Table S2:** Parameter estimates from a binomial GLMM, predicting the probability of an animal solving the task. Analysis without the HOI.

| General Linear Mixed Model of overall performance in the honey tool-task.                                                                                                                                                                                                              |          |           |          |                      |
|----------------------------------------------------------------------------------------------------------------------------------------------------------------------------------------------------------------------------------------------------------------------------------------|----------|-----------|----------|----------------------|
| Parameter estimates from a binomial GLMM, predicting the probability of an animal solving the task.                                                                                                                                                                                    |          |           |          |                      |
|                                                                                                                                                                                                                                                                                        | <i>B</i> | <i>SE</i> | <i>Z</i> | <i>p value</i>       |
| (Intercept)                                                                                                                                                                                                                                                                            | -0.609   | 0.91      | -0.670   | 0.503                |
| Age                                                                                                                                                                                                                                                                                    | 0.001    | 0.03      | 0.023    | 0.981                |
| SEX (male)                                                                                                                                                                                                                                                                             | -0.638   | 0.51      | -1.252   | 0.210                |
| Species (Sumatra)                                                                                                                                                                                                                                                                      | 0.186    | 0.56      | 0.332    | 0.740                |
| <u>Background</u>                                                                                                                                                                                                                                                                      |          |           |          |                      |
| Wild vs. Rest                                                                                                                                                                                                                                                                          | -0.360   | 0.22      | -1.604   | 0.109                |
| Rehab vs. Zoo                                                                                                                                                                                                                                                                          | -0.115   | 0.26      | -0.447   | 0.655                |
| Unknown vs. Rehab.Rest                                                                                                                                                                                                                                                                 | 0.221    | 0.21      | 1.041    | 0.298                |
| Human vs. Station (within rehabilitation station)                                                                                                                                                                                                                                      | -0.613   | 0.51      | -1.201   | 0.230                |
| Mother vs. Hand (within zoo)                                                                                                                                                                                                                                                           | 0.157    | 0.41      | 0.381    | 0.704                |
| <u>Accessibility (trend analysis)</u>                                                                                                                                                                                                                                                  |          |           |          |                      |
| Linear                                                                                                                                                                                                                                                                                 | 0.910    | 0.81      | 1.118    | 0.263                |
| Quadratic                                                                                                                                                                                                                                                                              | 1.499    | 0.83      | 1.803    | 0.071                |
| Cubic                                                                                                                                                                                                                                                                                  | 0.120    | 0.82      | 0.146    | 0.884                |
| <u>Sub-task (trend analysis)</u>                                                                                                                                                                                                                                                       |          |           |          |                      |
| Linear                                                                                                                                                                                                                                                                                 | -4.905   | 0.66      | -7.478   | <b>&lt;0.001 ***</b> |
| Quadratic                                                                                                                                                                                                                                                                              | 1.509    | 0.39      | 3.830    | <b>&lt;0.001 ***</b> |
| Cubic                                                                                                                                                                                                                                                                                  | 0.036    | 0.31      | 0.118    | 0.906                |
| Note: The model is controlling for repeated observations on each facility and individual. The performance in the honey tool-task was binary measured. The Analysis included 103 individuals in 12 different zoos/rehab stations, totalling 412 observations, $\chi^2= 236.43, P<0.001$ |          |           |          |                      |

**Supplementary Table S3:** Detailed list of all different exploration actions coded as relevant and irrelevant exploration during the time an individual engaged with the honey tool-task.

| Relevant Exploration Actions                                      | Irrelevant Exploration Actions                                      |
|-------------------------------------------------------------------|---------------------------------------------------------------------|
| Insert stick into L-shaped channel                                | Hit (with any body parts) test apparatus or board                   |
| Insert finger into L-shaped channel                               | Hit (with any body parts) table on which apparatus is presented     |
| Insert finger into I-shaped channel                               | Pull/ Push test apparatus, plexiglas, screws                        |
| Insert rope into I-shaped channel                                 | Pull/ Push table or board on which apparatus is presented           |
| Trace/ Poke finger outside glass of either I- or L-shaped channel | Touch test apparatus, plexiglas, screws (elsewhere but channels)    |
| Trace/ Poke stick outside glass of either I- or L-shaped channel  | Touch table or board on which apparatus is presented                |
| Tool modification/ manufacture                                    | Poke stick at apparatus, plexiglas, screws (elsewhere but channels) |
| Insert any other tool than stick or rope into L-shaped channel    | Poke stick at board/table on which apparatus is presented           |
| Insert any other tool than stick or rope into I-shaped channel    | Touch sticks on the floor or besides test apparatus                 |
| Poke or push stick at opening of L-shaped channel                 | Touch ropes on the floor or besides test apparatus                  |
| Poke or push stick at opening of I-shaped channel                 |                                                                     |
| Poke or push finger at opening of L-shaped channel                |                                                                     |
| Poke or push finger at opening of I-shaped channel                |                                                                     |

**Supplementary Table S4:** Linear Mixed-Effects Model of relevant exploration variety controlling for repeated observations on each facility.

|                                                                                                                                                                                                                        | <i>B</i> | <i>SE</i> | <i>df</i> | <i>t value</i> | <i>p value</i>       |
|------------------------------------------------------------------------------------------------------------------------------------------------------------------------------------------------------------------------|----------|-----------|-----------|----------------|----------------------|
| (Intercept)                                                                                                                                                                                                            | 1.209    | 1.41      | 48.66     | 0.857          | 0.396                |
| <b>HOI</b>                                                                                                                                                                                                             | 0.221    | 0.05      | 80.07     | 4.049          | <b>&lt;0.001 ***</b> |
| Age                                                                                                                                                                                                                    | 0.014    | 0.03      | 80.84     | 0.414          | 0.680                |
| SEX (male)                                                                                                                                                                                                             | -0.059   | 0.55      | 79.52     | -0.106         | 0.916                |
| Species (Sumatra)                                                                                                                                                                                                      | 0.946    | 0.87      | 6.31      | 1.084          | 0.318                |
| <u>Background</u>                                                                                                                                                                                                      |          |           |           |                |                      |
| Wild vs. Rest                                                                                                                                                                                                          | 0.162    | 0.25      | 75.37     | 0.652          | 0.517                |
| Rehab vs. Zoo                                                                                                                                                                                                          | 0.356    | 0.33      | 42.06     | 1.063          | 0.294                |
| Unknown vs. Rehab.Rest                                                                                                                                                                                                 | 0.408    | 0.23      | 80.76     | 1.746          | 0.085 .              |
| Human vs. Station (within rehabilitation station)                                                                                                                                                                      | -0.257   | 0.53      | 79.81     | -0.483         | 0.630                |
| Mother vs. Hand (within zoo)                                                                                                                                                                                           | 0.314    | 0.58      | 65.78     | 0.544          | 0.589                |
| <u>Accessibility (trend analysis)</u>                                                                                                                                                                                  |          |           |           |                |                      |
| Linear                                                                                                                                                                                                                 | 0.316    | 1.11      | 12.64     | 0.285          | 0.780                |
| Quadratic                                                                                                                                                                                                              | 0.467    | 1.13      | 23.52     | 0.411          | 0.685                |
| Cubic                                                                                                                                                                                                                  | 1.540    | 1.04      | 77.21     | 1.486          | 0.141                |
| <i>Note: The model is controlling for repeated observations on each facility. The analysis was totalling 94 observations in 10 different zoos/rehab stations, <math>\chi^2= 30.91</math>, <math>p&lt; .0005</math></i> |          |           |           |                |                      |

**Supplementary Table S5:** Pairwise comparisons of the Human Orientation Index (HOI) between the different background and rearing categories.

| Pairwise comparisons of HOI between different background categories, controlling for age, sex, island and repeated observations from each zoo and rehabilitation station. |          |           |          |                |
|---------------------------------------------------------------------------------------------------------------------------------------------------------------------------|----------|-----------|----------|----------------|
|                                                                                                                                                                           | <i>B</i> | <i>SE</i> | <i>Z</i> | <i>p value</i> |
| Hand-reared zoo - Station                                                                                                                                                 | 1.649    | 2.03      | 0.814    | 0.960          |
| Human - Station                                                                                                                                                           | -1.452   | 1.35      | -1.078   | 0.877          |
| Mother-reared zoo - Station                                                                                                                                               | -0.605   | 1.62      | -0.372   | 0.999          |
| Unknown - Station                                                                                                                                                         | -0.279   | 1.28      | -0.217   | 1.000          |
| Wild - Station                                                                                                                                                            | -3.568   | 2.46      | -1.450   | 0.670          |
| Human – Hand-reared zoo                                                                                                                                                   | -3.102   | 1.82      | -1.707   | 0.497          |
| Mother-reared zoo – Hand-reared zoo                                                                                                                                       | -2.254   | 1.50      | -1.499   | 0.637          |
| Unknown – Hand-reared zoo                                                                                                                                                 | -1.928   | 1.74      | -1.106   | 0.864          |
| Wild – Hand-reared zoo                                                                                                                                                    | -5.217   | 2.70      | -1.931   | 0.354          |
| Mother-reared zoo - Human                                                                                                                                                 | 0.847    | 1.35      | 0.626    | 0.987          |
| Unknown - Human                                                                                                                                                           | 1.174    | 0.94      | 1.249    | 0.792          |
| Wild - Human                                                                                                                                                              | -2.116   | 2.25      | -0.941   | 0.927          |
| Unknown – Mother-reared zoo                                                                                                                                               | 0.326    | 1.25      | 0.260    | 1.000          |
| Wild – Mother-reared zoo                                                                                                                                                  | -2.963   | 2.41      | -1.227   | 0.805          |
| Wild - Unknown                                                                                                                                                            | -3.289   | 2.41      | -1.468   | 0.658          |
| P-values corrected for multiple comparisons using Tukey.                                                                                                                  |          |           |          |                |

**Supplementary Table S6** study subjects.

| Individual       | Age in years at testing | years in captivity | species               | current housing | Category               |
|------------------|-------------------------|--------------------|-----------------------|-----------------|------------------------|
| <b>Amin</b>      | 6                       | 0.5                | <i>Pongo abelii</i>   | Reha-Station    | unknown background     |
| <b>Amos</b>      | 13                      | 13.0               | <i>Pongo pygmaeus</i> | Zoo             | Mother reared          |
| <b>Andalas</b>   | 3                       | 0.5                | <i>Pongo abelii</i>   | Reha-Station    | unknown background     |
| <b>Anette</b>    | 30                      | 30.0               | <i>Pongo abelii</i>   | Zoo             | Mother reared          |
| <b>Ari</b>       | 10                      | 8.0                | <i>Pongo pygmaeus</i> | Reha-Station    | Background with humans |
| <b>Ayu</b>       | 6                       | 0.5                | <i>Pongo abelii</i>   | Reha-Station    | unknown background     |
| <b>Bahruni</b>   | 10                      | 0.5                | <i>Pongo abelii</i>   | Reha-Station    | wild/ translocated     |
| <b>Bambang</b>   | 10.5                    | 5.0                | <i>Pongo pygmaeus</i> | Reha-Station    | Background with humans |
| <b>Batu</b>      | 14                      | 14.0               | <i>Pongo pygmaeus</i> | Zoo             | Mother reared          |
| <b>Bella</b>     | 14.5                    | 10.0               | <i>Pongo pygmaeus</i> | Reha-Station    | unknown background     |
| <b>Binti</b>     | 13                      | 13.0               | <i>Pongo pygmaeus</i> | Zoo             | Human hand reared      |
| <b>Budi</b>      | 8                       | 8.0                | <i>Pongo abelii</i>   | Zoo             | Mother reared          |
| <b>Cane</b>      | 10                      | 0.0                | <i>Pongo abelii</i>   | Reha-Station    | wild/ translocated     |
| <b>Cantik</b>    | 10                      | 8.0                | <i>Pongo pygmaeus</i> | Reha-Station    | unknown background     |
| <b>Ceky Chan</b> | 6                       | 0.0                | <i>Pongo abelii</i>   | Reha-Station    | Background with humans |
| <b>Cherie</b>    | 18                      | 18.0               | <i>Pongo pygmaeus</i> | Zoo             | Mother reared          |
| <b>Cici</b>      | 15                      | 10.0               | <i>Pongo pygmaeus</i> | Reha-Station    | unknown background     |
| <b>Dagu</b>      | 28                      | 28.0               | <i>Pongo abelii</i>   | Zoo             | Mother reared          |
| <b>Dana</b>      | 25                      | 25.0               | <i>Pongo abelii</i>   | Zoo             | Mother reared          |
| <b>Dandim</b>    | 12                      | 7.0                | <i>Pongo pygmaeus</i> | Reha-Station    | unknown background     |
| <b>Dewa</b>      | 12                      | 10.0               | <i>Pongo pygmaeus</i> | Reha-Station    | unknown background     |
| <b>Djamuna</b>   | 13                      | 13.0               | <i>Pongo abelii</i>   | Zoo             | Mother reared          |
| <b>Dokana</b>    | 25                      | 25.0               | <i>Pongo abelii</i>   | Zoo             | Mother reared          |
| <b>Dora</b>      | 3.5                     | 2.0                | <i>Pongo abelii</i>   | Reha-Station    | Background with humans |
| <b>Duanne</b>    | 10                      | 8.0                | <i>Pongo pygmaeus</i> | Reha-Station    | unknown background     |
| <b>Edwin</b>     | 11.5                    | 7.0                | <i>Pongo pygmaeus</i> | Reha-Station    | unknown background     |
| <b>Embrie</b>    | 10                      | 8.0                | <i>Pongo pygmaeus</i> | Reha-Station    | unknown background     |
| <b>Franky</b>    | 7                       | 0.5                | <i>Pongo abelii</i>   | Reha-Station    | unknown background     |
| <b>Friend</b>    | 5.5                     | 3.5                | <i>Pongo abelii</i>   | Reha-Station    | unknown background     |
| <b>Gagak</b>     | 9.5                     | 8.0                | <i>Pongo pygmaeus</i> | Reha-Station    | Reha-Station reared    |

|                 |      |      |                       |              |                        |
|-----------------|------|------|-----------------------|--------------|------------------------|
| <b>Galih</b>    | 10   | 7.0  | <i>Pongo pygmaeus</i> | Reha-Station | Background with humans |
| <b>Gambira</b>  | 18   | 18.0 | <i>Pongo pygmaeus</i> | Zoo          | Mother reared          |
| <b>Gina</b>     | 49   | 45.0 | <i>Pongo abelii</i>   | Zoo          | Mother reared          |
| <b>Gober</b>    | 25   | 5.0  | <i>Pongo abelii</i>   | Reha-Station | wild/ translocated     |
| <b>Harry</b>    | 8.5  | 7.0  | <i>Pongo pygmaeus</i> | Reha-Station | Reha-Station reared    |
| <b>Hulu</b>     | 14   | 8.0  | <i>Pongo pygmaeus</i> | Reha-Station | Background with humans |
| <b>Imas</b>     | 9.5  | 8.0  | <i>Pongo pygmaeus</i> | Reha-Station | Background with humans |
| <b>Inou</b>     | 17   | 15.0 | <i>Pongo pygmaeus</i> | Reha-Station | unknown background     |
| <b>Ito</b>      | 6    | 6.0  | <i>Pongo pygmaeus</i> | Zoo          | Mother reared          |
| <b>Jack2</b>    | 9    | 6.0  | <i>Pongo pygmaeus</i> | Reha-Station | Background with humans |
| <b>Jacky</b>    | 5    | 1.0  | <i>Pongo abelii</i>   | Reha-Station | Background with humans |
| <b>Janu</b>     | 6    | 4.0  | <i>Pongo pygmaeus</i> | Reha-Station | unknown background     |
| <b>Jarot</b>    | 5    | 4.0  | <i>Pongo abelii</i>   | Reha-Station | Reha-Station reared    |
| <b>Jarwo</b>    | 15   | 10.0 | <i>Pongo pygmaeus</i> | Reha-Station | unknown background     |
| <b>Jaya</b>     | 9    | 9.0  | <i>Pongo abelii</i>   | Zoo          | Mother reared          |
| <b>Jill</b>     | 8    | 7.0  | <i>Pongo pygmaeus</i> | Reha-Station | Reha-Station reared    |
| <b>Jose</b>     | 21   | 21.0 | <i>Pongo pygmaeus</i> | Zoo          | Mother reared          |
| <b>Julius</b>   | 5    | 2.0  | <i>Pongo abelii</i>   | Reha-Station | Background with humans |
| <b>Karan</b>    | 10   | 8.0  | <i>Pongo pygmaeus</i> | Reha-Station | unknown background     |
| <b>Karen</b>    | 15   | 9.0  | <i>Pongo pygmaeus</i> | Reha-Station | unknown background     |
| <b>Kasmin</b>   | 10.5 | 9.0  | <i>Pongo pygmaeus</i> | Reha-Station | Background with humans |
| <b>Kevin</b>    | 32   | 32.0 | <i>Pongo pygmaeus</i> | Zoo          | Human hand reared      |
| <b>Kibriah</b>  | 36   | 36.0 | <i>Pongo pygmaeus</i> | Zoo          | Human hand reared      |
| <b>Kila</b>     | 13   | 13.0 | <i>Pongo abelii</i>   | Zoo          | Mother reared          |
| <b>King</b>     | 17   | 10.0 | <i>Pongo pygmaeus</i> | Reha-Station | unknown background     |
| <b>Kraba</b>    | 12   | 10.0 | <i>Pongo pygmaeus</i> | Reha-Station | unknown background     |
| <b>Lanang</b>   | 11   | 10.0 | <i>Pongo pygmaeus</i> | Reha-Station | Reha-Station reared    |
| <b>Mali</b>     | 20   | 20.0 | <i>Pongo pygmaeus</i> | Zoo          | Mother reared          |
| <b>Mandi</b>    | 14   | 14.0 | <i>Pongo pygmaeus</i> | Zoo          | Human hand reared      |
| <b>Mawoto</b>   | 17   | 13.0 | <i>Pongo pygmaeus</i> | Reha-Station | unknown background     |
| <b>Maya</b>     | 5    | 5.0  | <i>Pongo abelii</i>   | Zoo          | Mother reared          |
| <b>Mercedes</b> | 12   | 10.0 | <i>Pongo pygmaeus</i> | Reha-Station | unknown background     |
| <b>Natalia</b>  | 18   | 0.0  | <i>Pongo abelii</i>   | Reha-Station | wild/ translocated     |
| <b>Natalie</b>  | 11   | 9.0  | <i>Pongo pygmaeus</i> | Reha-Station | unknown background     |

|                 |      |      |                       |              |                        |
|-----------------|------|------|-----------------------|--------------|------------------------|
| <b>Niken</b>    | 16   | 14.0 | <i>Pongo pygmaeus</i> | Reha-Station | unknown background     |
| <b>Nonja</b>    | 36   | 36.0 | <i>Pongo pygmaeus</i> | Zoo          | Human hand reared      |
| <b>Oracle</b>   | 8.5  | 7.0  | <i>Pongo pygmaeus</i> | Reha-Station | Reha-Station reared    |
| <b>Otong</b>    | 13   | 11.0 | <i>Pongo pygmaeus</i> | Reha-Station | unknown background     |
| <b>Padana</b>   | 16   | 16.0 | <i>Pongo abelii</i>   | Zoo          | Mother reared          |
| <b>Pilar</b>    | 11   | 9.0  | <i>Pongo pygmaeus</i> | Reha-Station | Background with humans |
| <b>Pini</b>     | 25   | 25.0 | <i>Pongo abelii</i>   | Zoo          | Mother reared          |
| <b>Pongo</b>    | 15   | 15.0 | <i>Pongo pygmaeus</i> | Zoo          | Mother reared          |
| <b>Radja</b>    | 52   | 51.0 | <i>Pongo pygmaeus</i> | Zoo          | Mother reared          |
| <b>Raja</b>     | 13   | 13.0 | <i>Pongo abelii</i>   | Zoo          | Mother reared          |
| <b>Ramon</b>    | 18   | 18.0 | <i>Pongo pygmaeus</i> | Zoo          | Human hand reared      |
| <b>Roma</b>     | 17   | 13.0 | <i>Pongo pygmaeus</i> | Reha-Station | unknown background     |
| <b>Rowland</b>  | 10   | 8.0  | <i>Pongo pygmaeus</i> | Reha-Station | unknown background     |
| <b>Runtu</b>    | 13   | 8.0  | <i>Pongo pygmaeus</i> | Reha-Station | Background with humans |
| <b>Sabin</b>    | 9.5  | 9.0  | <i>Pongo pygmaeus</i> | Reha-Station | Reha-Station reared    |
| <b>Sandakan</b> | 32   | 32.0 | <i>Pongo pygmaeus</i> | Zoo          | Mother reared          |
| <b>Sari</b>     | 43   | 43.0 | <i>Pongo pygmaeus</i> | Zoo          | Human hand reared      |
| <b>Sarimin</b>  | 11   | 9.0  | <i>Pongo pygmaeus</i> | Reha-Station | unknown background     |
| <b>Silvia</b>   | 49   | 48.0 | <i>Pongo pygmaeus</i> | Zoo          | Mother reared          |
| <b>Sony</b>     | 16   | 12.0 | <i>Pongo pygmaeus</i> | Reha-Station | unknown background     |
| <b>Suaq</b>     | 5    | 5.0  | <i>Pongo abelii</i>   | Zoo          | Mother reared          |
| <b>Sule</b>     | 7    | 4.0  | <i>Pongo pygmaeus</i> | Reha-Station | unknown background     |
| <b>Summer</b>   | 13   | 13.0 | <i>Pongo pygmaeus</i> | Zoo          | Mother reared          |
| <b>Suri</b>     | 5    | 3.0  | <i>Pongo abelii</i>   | Reha-Station | Background with humans |
| <b>Tanah</b>    | 5    | 5.0  | <i>Pongo abelii</i>   | Zoo          | Mother reared          |
| <b>Tao</b>      | 8    | 8.0  | <i>Pongo abelii</i>   | Zoo          | Mother reared          |
| <b>Temmy</b>    | 31   | 31.0 | <i>Pongo pygmaeus</i> | Zoo          | Human hand reared      |
| <b>Toba</b>     | 18   | 18.0 | <i>Pongo abelii</i>   | Zoo          | Mother reared          |
| <b>Trio</b>     | 16   | 13.0 | <i>Pongo pygmaeus</i> | Reha-Station | unknown background     |
| <b>Ulin</b>     | 14   | 11.0 | <i>Pongo pygmaeus</i> | Reha-Station | unknown background     |
| <b>Vendel</b>   | 13   | 13.0 | <i>Pongo abelii</i>   | Zoo          | Mother reared          |
| <b>Victor</b>   | 10.5 | 9.0  | <i>Pongo pygmaeus</i> | Reha-Station | Background with humans |
| <b>Victoria</b> | 31   | 31.0 | <i>Pongo pygmaeus</i> | Zoo          | Human hand reared      |
| <b>Walter</b>   | 23   | 23.0 | <i>Pongo abelii</i>   | Zoo          | Mother reared          |



|                |    |      |                       |              |                        |
|----------------|----|------|-----------------------|--------------|------------------------|
| <b>Wattana</b> | 18 | 18.0 | <i>Pongo pygmaeus</i> | Zoo          | Human hand reared      |
| <b>Willy</b>   | 6  | 3.0  | <i>Pongo abelii</i>   | Reha-Station | Background with humans |
| <b>Winda</b>   | 12 | 7.0  | <i>Pongo pygmaeus</i> | Reha-Station | wild/ translocated     |
| <b>Yogi</b>    | 8  | 8.0  | <i>Pongo pygmaeus</i> | Reha-Station | Reha-Station reared    |
| <b>Zatarra</b> | 10 | 8.0  | <i>Pongo pygmaeus</i> | Reha-Station | unknown background     |

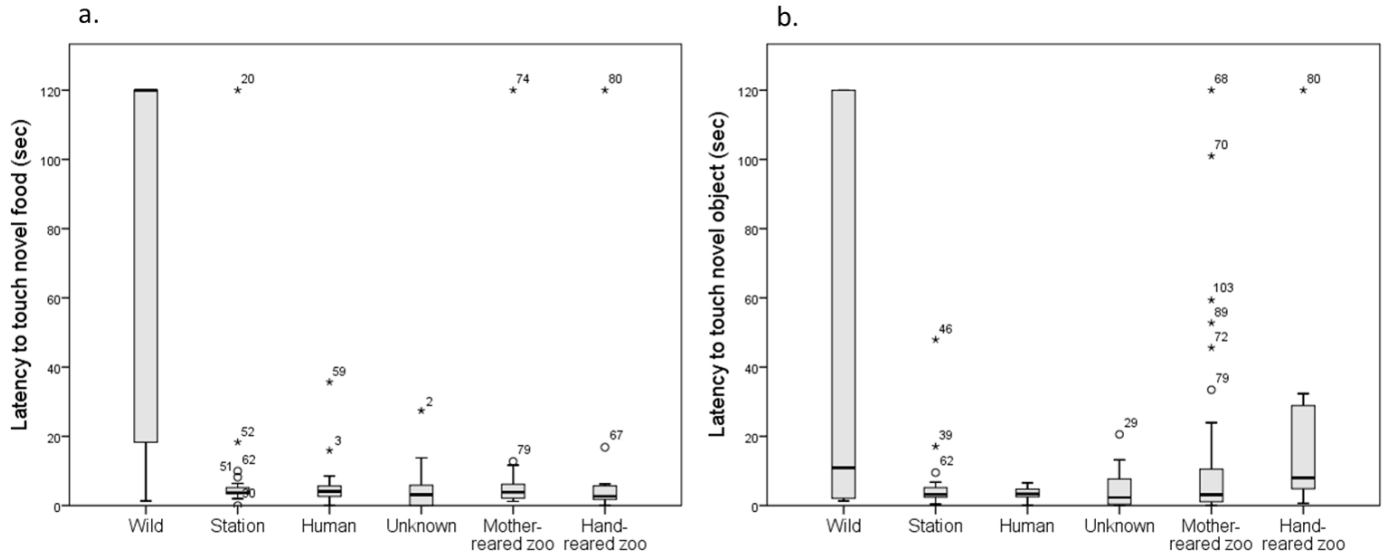

**Figure S1: Novelty response across individuals of different background categories. (a) Latency to touch novel food and (b) Latency to touch a novel object.**
